# Supplementary material for: Enhanced charge carrier separation by bi-piezoelectric effects based on pine needle-like BaTiO3/ZnO continuous nanofibers
Source: Royal Society of Chemistry journal article supplement (doi:10.1039/d2ta01578a), 2022-01-01
Supplement: d2ta01578a1.pdf [file d2ta01578a1.pdf]

## Supplementary material

### **Enhanced charge carriers separation by bi-piezoelectric effects based on pine needle-like BaTiO<sub>3</sub>/ZnO continuous nanofibers**

Wanxing Zheng <sup>a</sup> Yufei Tang <sup>a,b,\*</sup>, Zhaowei Liu <sup>a</sup>, Guoxin Xing <sup>a</sup>, Kang Zhao <sup>a,b</sup>

*a Department of Materials Science and Engineering Xi'an University of Technology, Xi'an 710048, PR China. E-mail: [yftang@xaut.edu.cn](mailto:yftang@xaut.edu.cn)*

*b Shaanxi Province Key Laboratory of Corrosion and Protection, Xi'an University of Technology, Xi'an 710048, PR China.*

*\*Corresponding author. E-mail: [yftang@xaut.edu.cn](mailto:yftang@xaut.edu.cn)*

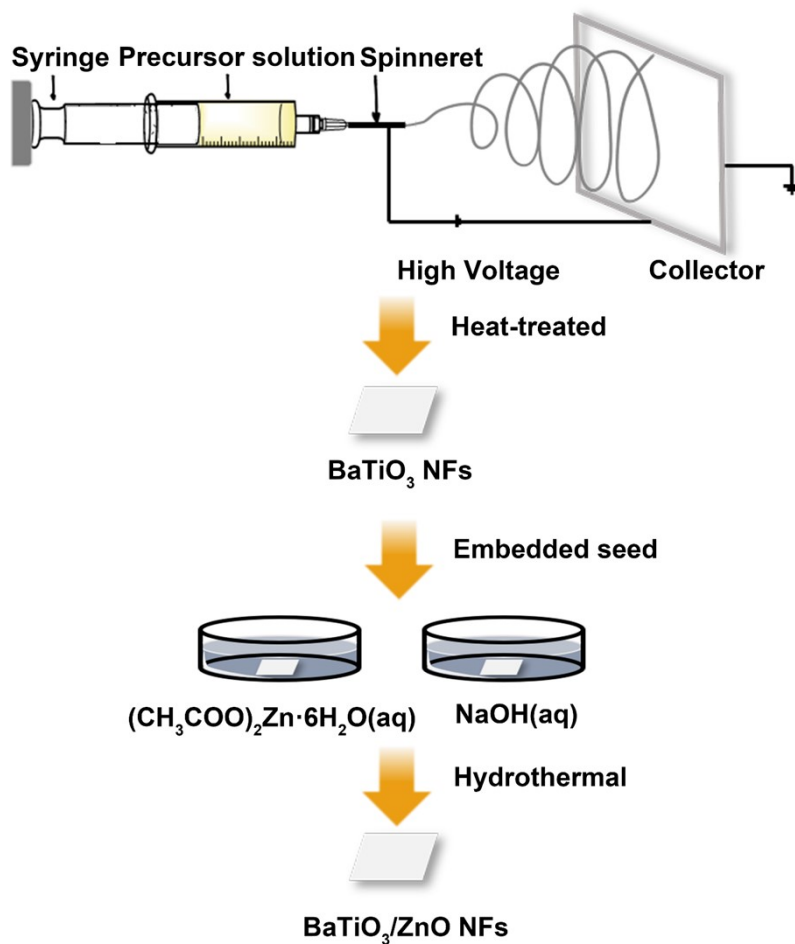

**Scheme S1.** The diagram of fabrication of BaTiO<sub>3</sub>/ZnO continuous nanofibers.

The N<sub>2</sub> adsorption-desorption measurements of BaTiO<sub>3</sub>/ZnO continuous nanofibers with different interface densities are shown in Fig. S1, and the corresponding specific surface area, pore volume and pore diameter are summarized in Table S1. All the isotherms are identified as type IV, with H3 hysteresis loops, suggesting their porous structure. As shown in Table S1, the BET surface area of BTZ-0.02, BTZ-0.04 and BTZ-0.06 are 14.7148, 18.8191 and 18.6058 m<sup>2</sup>/g, respectively. The last one is smaller than BTZ-0.04, which may be the numerous ZnO nanorods completely cover the BaTiO<sub>3</sub> nanofibers.

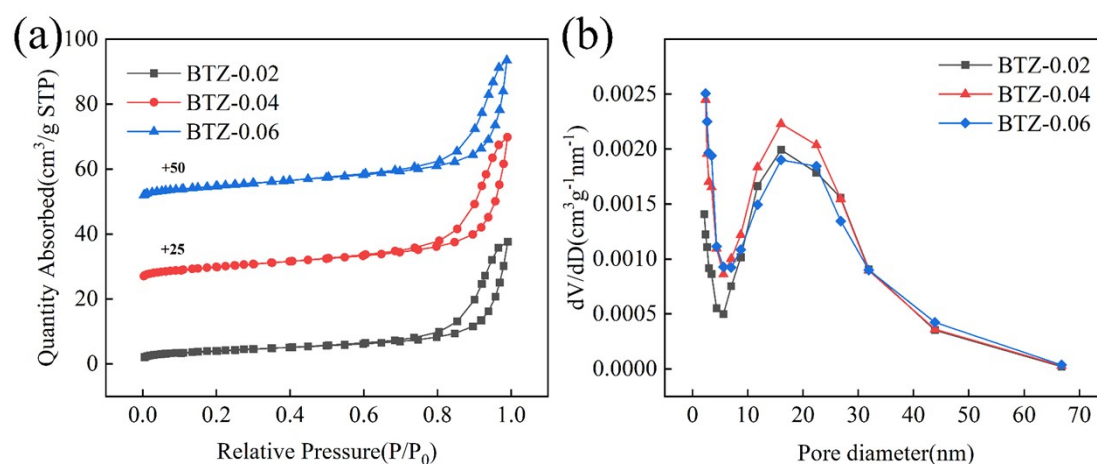

Fig. S1. (a) N<sub>2</sub> adsorption-desorption curve and (b) BJH pore size distribution of BTZ-series samples.

Table S1. Specific surface area, total pore volume and average pore diameter of BTZ samples

| samples  | S (m <sup>2</sup> /g, BET) | Pore volume (cm <sup>3</sup> /g, BET) | pore diameter (nm, BJH) |
|----------|----------------------------|---------------------------------------|-------------------------|
| BTZ-0.02 | 14.7148                    | 0.058226                              | 17.4693                 |
| BTZ-0.04 | 18.8191                    | 0.069292                              | 15.6627                 |
| BTZ-0.06 | 18.6058                    | 0.067268                              | 15.2836                 |

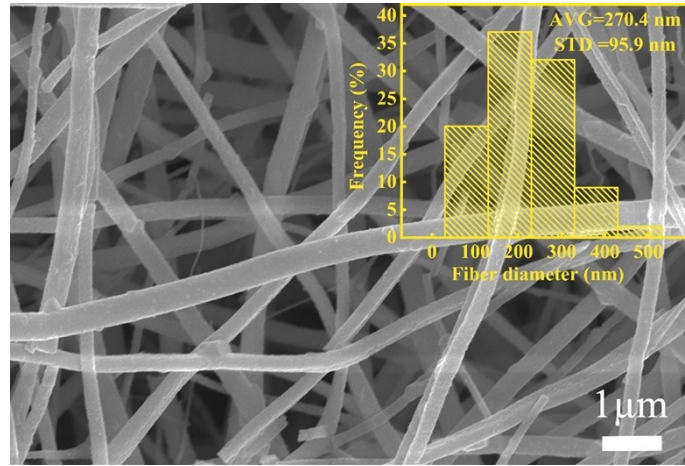

Fig. S2. SEM image of BaTiO<sub>3</sub> nanofibers and the inset is corresponding diameter distribution diagram.

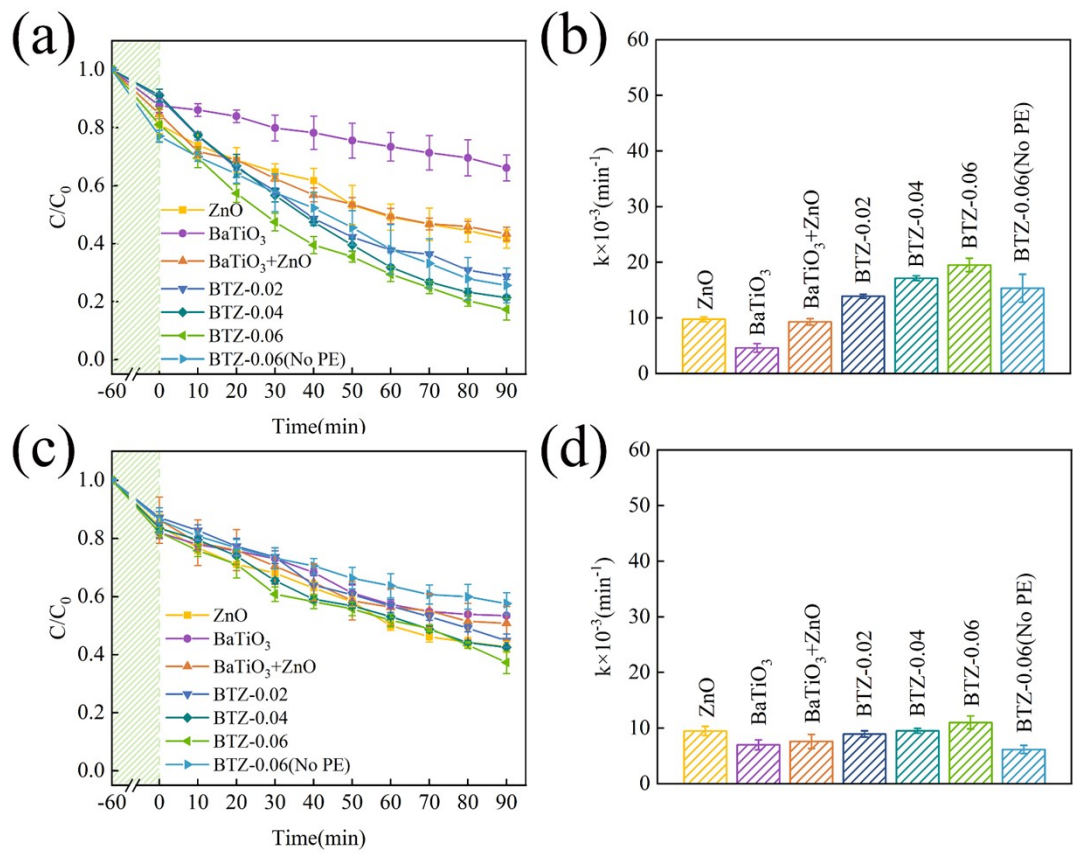

Fig. S3. The degradation curve and the corresponding comparison of degradation ratios of BaTiO<sub>3</sub>/ZnO continuous nanofibers on the degradation of RhB under (a, b) light only, (c, d) ultrasonic only.

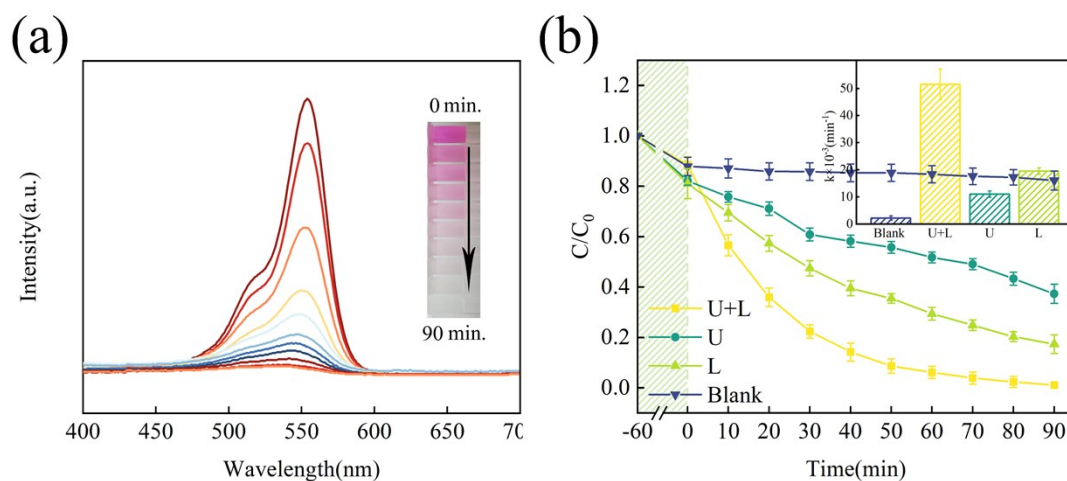

Fig. S4. (a) Catalytic behaviors for degradation of RhB by the BTZ-0.06 under UV light irradiation and ultrasonic, the ultrasound power is fixed at 120W, (b) The degradation curve of BTZ-0.06 continuous nanofibers on the degradation of RhB under different experimental conditions, the inset is corresponding comparison of reaction rate constant.

Fig.S5ii shows the SEM image of BTZ-0.08, it can be seen that ZnO almost covered BaTiO<sub>3</sub> nanofibers. In addition, the nucleation sites of ZnO on the BaTiO<sub>3</sub> nanofibers were increased due to the higher concentration of the precursors. During the hydrothermal self-assembly, the grown rods met each other and merged together, resulting in BTZ-0.08 no longer having a pine needle-like structure. In other words, ZnO in BTZ-0.08 has no one-dimensional form, which may reduce utilization of ultrasonic. Fig. S5 shows the degradation curve of BTZ-0.08 continuous nanofibers on the degradation of RhB under UV light irradiation and ultrasonic, it can be observed that the degradation reaches 97.64% after 90min. The degradation is not much different from that of BTZ-0.06(98.94%). However, the reaction rate constants( $42.27 \times 10^{-3} \text{ min}^{-1}$ ) is significantly lower than that of BTZ-0.06( $51.50 \times 10^{-3} \text{ min}^{-1}$ ), as shown in Fig. S5i. This result can be ascribed to merged ZnO makes partial of the BaTiO<sub>3</sub>/ZnO composite interface ineffective.

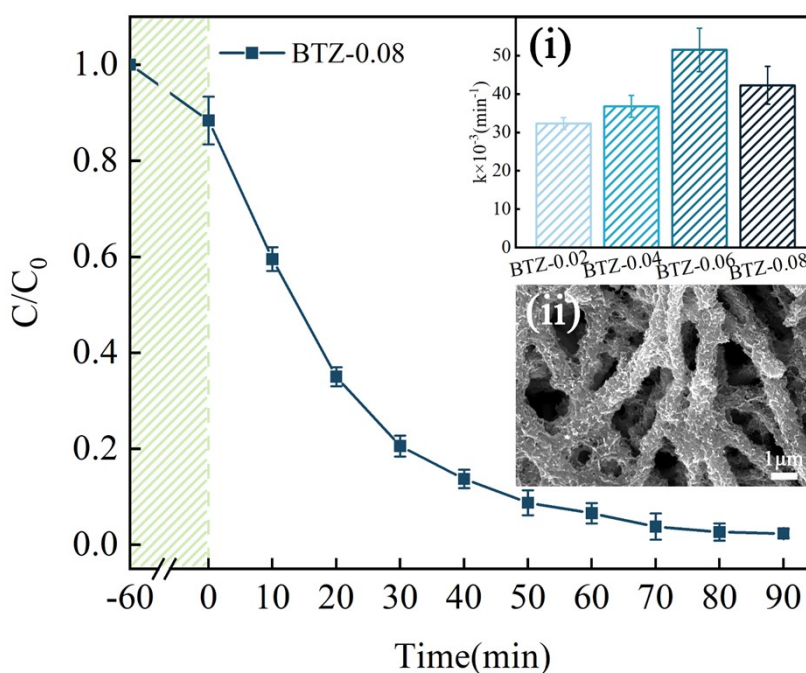

Fig. S5. The degradation curve of BTZ-0.08 continuous nanofibers on the degradation of RhB under UV light irradiation and ultrasonic. Inset (i) is the corresponding comparison of reaction rate constant, (ii) presents SEM image of BTZ-0.08 continuous nanofibers.



Fig. S6 shows the XRD patterns of the BaTiO<sub>3</sub> NFs obtained at different calcination temperatures and composite nanofibers after growing ZnO nanorods. The diffraction peaks of BTZ-0.06-700°C are sharp and clear, and there are no double peaks at the diffraction angles around 22°, 45°, 50°, 65°, 70°, indicating that they perfectly match cubic BaTiO<sub>3</sub> (PDF#JCPDS: 31-0174). The diffraction peaks of BTZ-0.06-800°C (i.e., BTZ-0.06) has double peaks near the above diffraction angles, which indicates that BaTiO<sub>3</sub> in BTZ-0.06 is tetragonal phase.

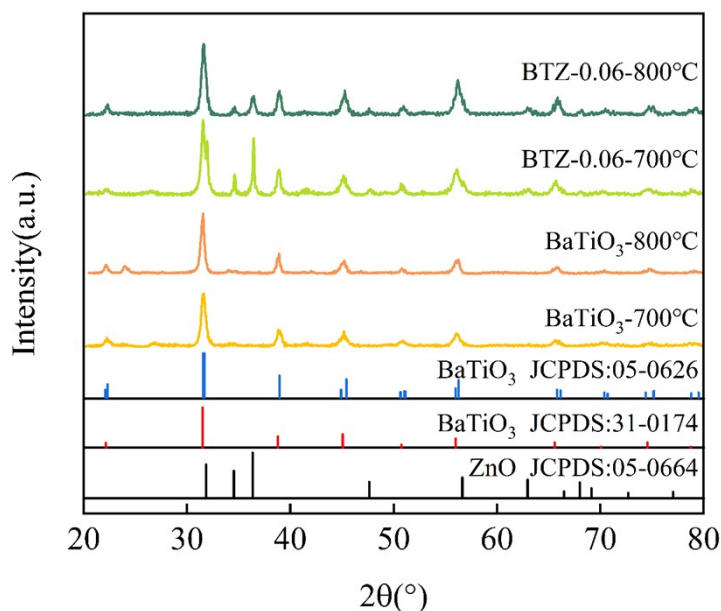

Fig. S6. XRD patterns of the BaTiO<sub>3</sub> NFs obtained at different calcination temperatures and composite nanofibers after growing ZnO nanorods.

The only difference between the fabrication of BTZ-0.06 and BTZ-0.06-700°C is the heat treatment temperature, which has no effect on the morphology of BaTiO<sub>3</sub>/ZnO.

Fig. S7 shows the SEM image of the BTZ-0.06-700°C continuous nanofibers and shown below as well. It can be observed that BTZ-0.06-700°C still is pine needle-like

structure. Therefore, the difference between the BTZ-0.06-700°C and BTZ-0.06 is that the BaTiO<sub>3</sub> nanofibers in the former do not possess piezoelectricity.

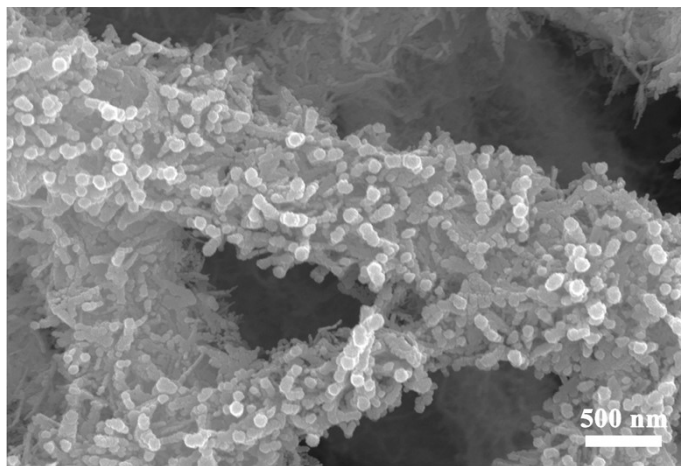

Fig. S7. SEM image of the BTZ-0.06-700°C continuous nanofibers.

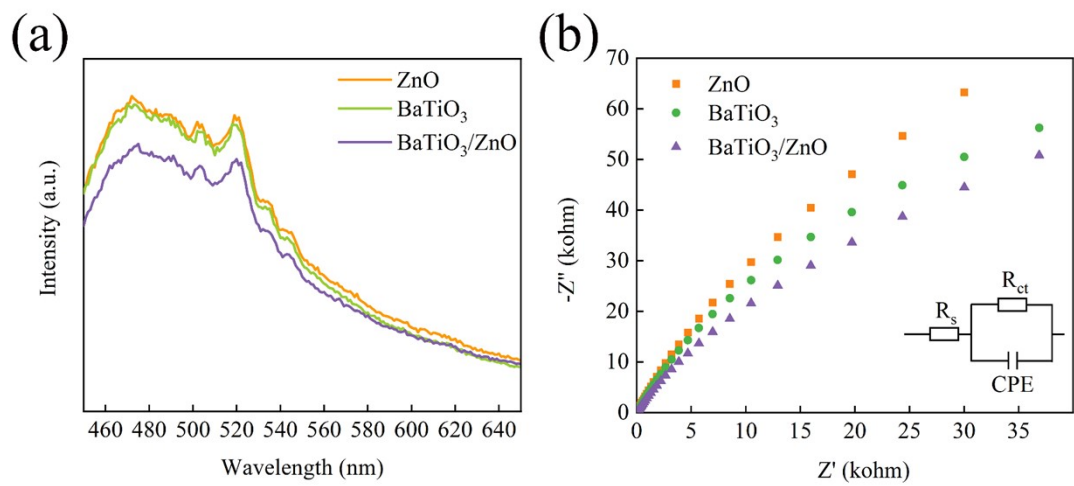

Fig. S8. (a) PL spectrum, (b) EIS curves of ZnO, BaTiO<sub>3</sub> and BaTiO<sub>3</sub>/ZnO (BTZ-0.06) continuous nanofibers.

To explore the migration route of photogenerated carriers more clearly, it is necessary to clarify the energy band structure of BaTiO<sub>3</sub> and ZnO. Fig. S9a shows UV-Vis absorption diffuse reflectance spectra of ZnO, BaTiO<sub>3</sub> and BaTiO<sub>3</sub>/ZnO. The intrinsic absorption edges of BaTiO<sub>3</sub> and ZnO are 386 nm and 395 nm, respectively, and BaTiO<sub>3</sub>/ZnO is located between them. It's caused by heterojunction in BaTiO<sub>3</sub>/ZnO. The calculated band gaps of ZnO and BaTiO<sub>3</sub> using a taucplot are shown in Fig. S9b, and are 3.18 eV and 3.32 eV, respectively. The edge positions of BaTiO<sub>3</sub> and ZnO are obtained from Fig. S8c, the valance band potential( $E_{VB}$ ) of BaTiO<sub>3</sub> and ZnO are 1.51 eV and 2.51 eV, respectively. The conduction band potential( $E_{CB}$ ) can be calculated by the empirical equation as follows:

$$E_{CB}=E_{VB}-E_g$$

The  $E_{CB}$  of BaTiO<sub>3</sub> and ZnO are calculated at about -1.81 eV and -0.69 eV, respectively. Based on this, the energy band structure of pine needle-like BaTiO<sub>3</sub>/ZnO continuous nanofibers can be obtained as shown in Fig. S9d.

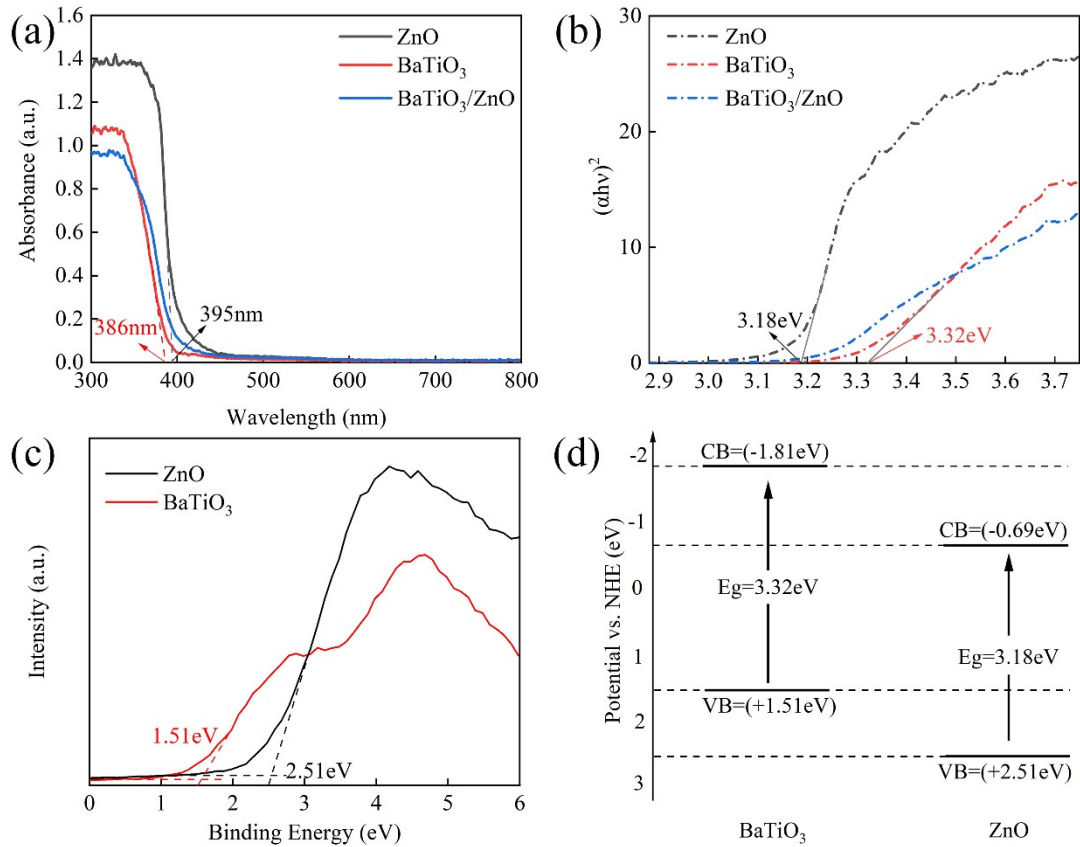

Fig. S9. Band structure of pine needle-like BaTiO<sub>3</sub>/ZnO composite nanofibers: (a) Uv-vis absorption spectrum, (b) Plot of  $(\alpha h\nu)^2 - h\nu$ , (c) XPS valence band spectrum of ZnO and BaTiO<sub>3</sub>, (d) schematic diagram of band structure.

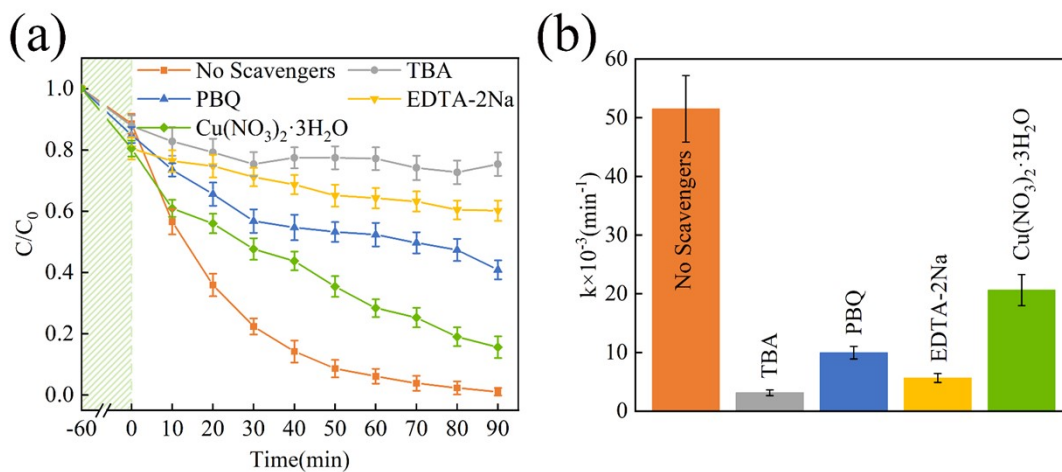

Fig. S10. (a) Piezophotocatalytic degradation with BTZ-0.06 in the presence of  $\cdot\text{OH}$ (TBA),  $\cdot\text{O}_2^-$ (PBQ),  $\text{h}^+$ (EDTA-2Na) and  $\text{e}^-$ ( $\text{Cu}(\text{NO}_3)_2 \cdot 3\text{H}_2\text{O}$ ) scavengers. (b) Comparisons of the reaction rate constants with different radicals' scavengers.

Fig. S11 shows the degradation curve of BaTiO<sub>3</sub>/ZnO continuous nanofibers on the degradation of different pollutants under ultrasonic and light. Regardless of dyes or antibiotics, the pine needle-like BaTiO<sub>3</sub>/ZnO continuous nanofibers can degrade 85% of pollutants, indicating no selectivity for pollutants. BTZ-series samples presents better degradation performance that BTZ-0.06. The difference between the BTZ-0.06(No PE) and BTZ-0.06 is that the BaTiO<sub>3</sub> nanofibers in the former do not possess piezoelectricity. Therefore, the bi-piezoelectric enhancement promotion mechanism works only in the BTZ-series samples. However, bi-piezoelectric-promoted photogenerated carrier separation is directly manifested with the rate of catalytic reaction, and the reaction rates for the degradation of different pollutants are summarized in Fig. 8b.

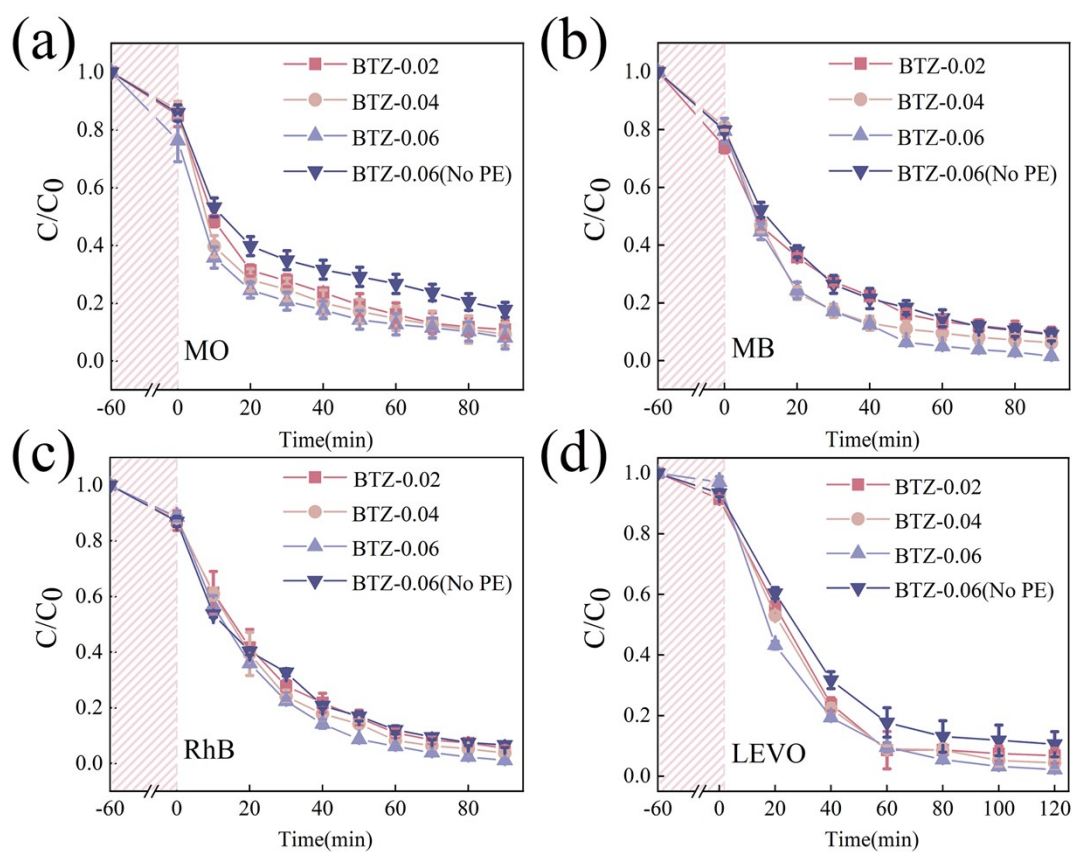

Fig. S11. The degradation curve of BaTiO<sub>3</sub>/ZnO continuous nanofibers on the degradation of different pollutants under ultrasonic and light, (a)MO, (b)MB, (c)RhB, (d) LEVO.
